# Supplementary material for: Ionic liquids-ultrasound based efficient extraction of flavonoid glycosides and triterpenoid saponins from licorice
Source: PubMed Central journal article supplement (PMC9079881; doi:10.1039/c8ra01056k), 2018-04-16
Supplement: RA-008-C8RA01056K-s001.pdf [file RA-008-C8RA01056K-s001.pdf]

## **Ionic liquids-ultrasound based efficient extraction of flavonoid glycosides and triterpenoid saponins from licorice**

Shuai Ji <sup>1,2,#</sup>, Yujie Wang <sup>1,#</sup>, Zhenyu Su <sup>1</sup>, Dandan He <sup>1</sup>, Yan Du <sup>1</sup>, Mengzhe Guo <sup>1,2</sup>,  
Dongzhi Yang <sup>1,2</sup>, Daoquan Tang <sup>1,2,\*</sup>

<sup>1</sup> *Department of Pharmaceutical Analysis, School of Pharmacy, Xuzhou Medical University, 209 Tongshan Road, Xuzhou 221004, China*

<sup>2</sup> *Jiangsu Key Laboratory of New Drug Research and Clinical Pharmacy, School of Pharmacy, Xuzhou Medical University, 209 Tongshan Road, Xuzhou 221004, China*

# The first two authors (S. Ji and Y. Wang) contributed equally to this paper.

\* Corresponding authors. Tel.: +86 516 83263133. Fax: +86 516 83263133. Email address: [tdq993@hotmail.com](mailto:tdq993@hotmail.com) or [tangdq@xzhmu.edu.cn](mailto:tangdq@xzhmu.edu.cn).

**Table S1.** Names and structures of ionic liquids used in this study.

| Names                                         | Abbreviations                        | Cations                                                                               | Anions                        |
|-----------------------------------------------|--------------------------------------|---------------------------------------------------------------------------------------|-------------------------------|
| 1-butyl-3-methylimidazolium acetate           | [C <sub>4</sub> MIM]Ac               | 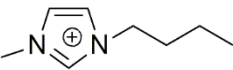   | Ac <sup>-</sup>               |
| 1-butyl-3-methylimidazolium chloride          | [C <sub>4</sub> MIM]Cl               |    | Cl <sup>-</sup>               |
| 1-butyl-3-methylimidazolium tetrafluoroborate | [C <sub>4</sub> MIM]BF <sub>4</sub>  |    | BF <sub>4</sub> <sup>-</sup>  |
| 1-butyl-3-methylimidazolium nitrate           | [C <sub>4</sub> MIM]NO <sub>3</sub>  |    | NO <sub>3</sub> <sup>-</sup>  |
| 1-butyl-3-methylimidazolium hydrogen sulfate  | [C <sub>4</sub> MIM]HSO <sub>4</sub> |    | HSO <sub>4</sub> <sup>-</sup> |
| 1-ethyl-3-methylimidazolium bromide           | [C <sub>2</sub> MIM]Br               |    | Br <sup>-</sup>               |
| 1-butyl-3-methylimidazolium bromide           | [C <sub>4</sub> MIM]Br               |    | Br <sup>-</sup>               |
| 1-hexyl-3-methylimidazolium bromide           | [C <sub>6</sub> MIM]Br               |   | Br <sup>-</sup>               |
| 1-octyl-3-methylimidazolium bromide           | [C <sub>8</sub> MIM]Br               |  | Br <sup>-</sup>               |
| 1-decyl-3-methylimidazolium bromide           | [C <sub>10</sub> MIM]Br              |  | Br <sup>-</sup>               |

**Table S2.** Recoveries of LA, LQ, ILA, ILQ and GA from licorice.

| Analyte | Original (mg) | Added (mg) | Found (mg) | Recovery (%) | Mean (%) | RSD (%) |
|---------|---------------|------------|------------|--------------|----------|---------|
| LA      | 3.09          | 3.04       | 6.00       | 95.78        | 101.51   | 3.54    |
|         | 2.79          | 3.05       | 5.98       | 104.91       |          |         |
|         | 2.72          | 3.05       | 5.90       | 104.32       |          |         |
|         | 2.78          | 3.07       | 5.94       | 102.86       |          |         |
|         | 2.86          | 3.08       | 5.89       | 98.50        |          |         |
|         | 2.72          | 3.08       | 5.88       | 102.67       |          |         |
| LQ      | 4.91          | 4.06       | 8.94       | 99.09        | 101.19   | 2.95    |
|         | 4.93          | 4.06       | 8.89       | 97.44        |          |         |
|         | 4.75          | 4.08       | 8.80       | 99.31        |          |         |
|         | 4.63          | 4.10       | 8.85       | 102.73       |          |         |
|         | 4.54          | 4.10       | 8.79       | 103.65       |          |         |
|         | 4.46          | 4.11       | 8.77       | 104.94       |          |         |
| ILA     | 0.67          | 0.59       | 1.25       | 97.15        | 101.68   | 2.67    |
|         | 0.65          | 0.59       | 1.24       | 99.80        |          |         |
|         | 0.62          | 0.59       | 1.23       | 102.12       |          |         |
|         | 0.62          | 0.60       | 1.24       | 103.06       |          |         |
|         | 0.60          | 0.60       | 1.23       | 103.88       |          |         |
|         | 0.59          | 0.60       | 1.22       | 104.09       |          |         |
| ILQ     | 0.54          | 0.61       | 1.13       | 97.25        | 100.04   | 2.00    |
|         | 0.54          | 0.61       | 1.14       | 98.46        |          |         |
|         | 0.53          | 0.61       | 1.13       | 99.22        |          |         |
|         | 0.51          | 0.61       | 1.14       | 102.17       |          |         |
|         | 0.50          | 0.61       | 1.13       | 101.53       |          |         |
|         | 0.50          | 0.62       | 1.12       | 101.57       |          |         |
| GA      | 12.21         | 9.09       | 20.95      | 96.10        | 98.69    | 3.12    |
|         | 12.09         | 9.10       | 20.84      | 96.14        |          |         |
|         | 11.89         | 9.13       | 20.61      | 95.50        |          |         |
|         | 11.54         | 9.17       | 20.81      | 101.09       |          |         |
|         | 11.29         | 9.22       | 20.60      | 101.04       |          |         |
|         | 11.08         | 9.26       | 20.56      | 102.28       |          |         |

Note: LA, liquiritin apioside; LQ, liquiritin; ILA, isoliquiritin apioside; ILQ, isoliquiritin; GA, glycyrrhizic acid.

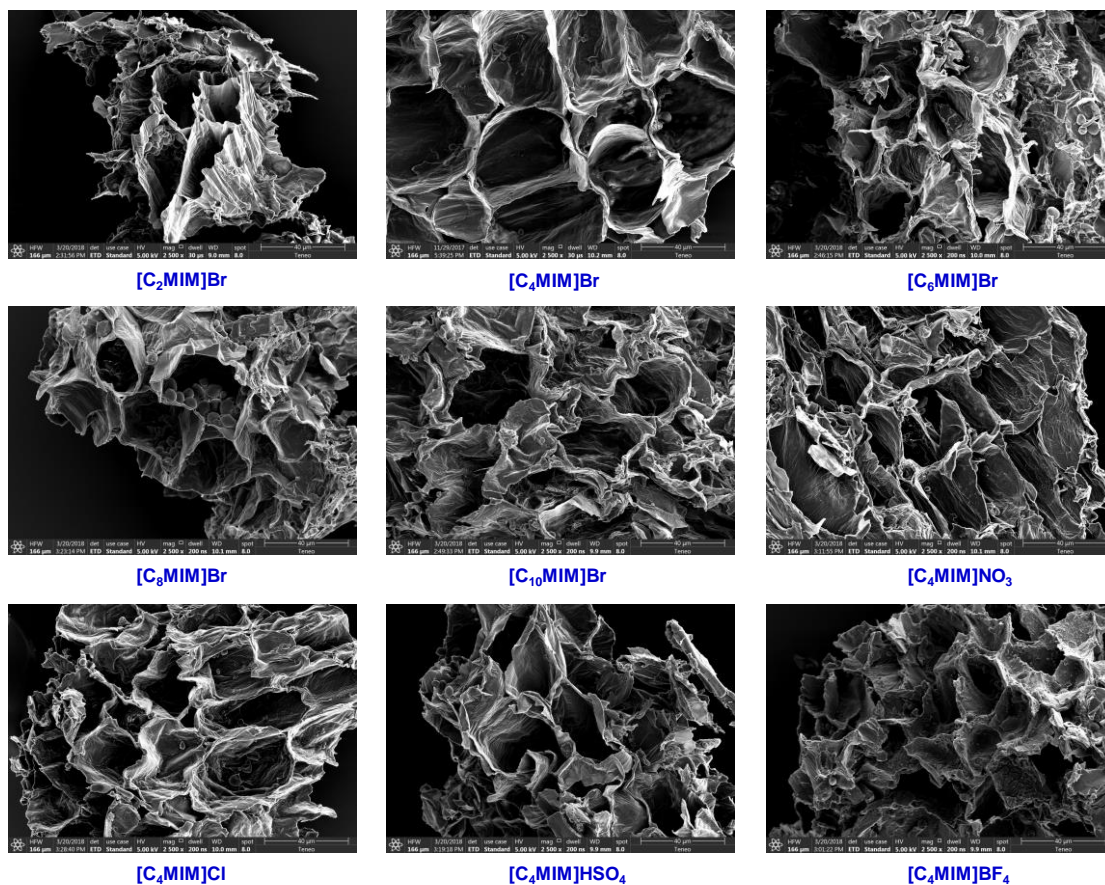

**Fig. S1.** SEM graphics of licorice samples treated using different solvents. The samples were observed under  $2500\times$  magnification.
